# Supplementary material
Source: PubMed Central journal article supplement (PMC5625058)

**Reductions in the mitochondrial ABC transporter Abcb10 affect the transcriptional profile of heme biosynthesis genes**

Alexandra Seguin<sup>1,2</sup>, Naoko Takahashi-Makise<sup>1,2</sup>, Yvette Y. Yien<sup>3</sup>, Nicholas C. Huston<sup>3</sup>, Jared C. Whitman<sup>3</sup>, Gabriel Musso<sup>4</sup>, Jared A. Wallace<sup>1</sup>, Thomas Bradley<sup>1</sup>, Hector Bergonia<sup>5</sup>, Martin D. Kafina<sup>3</sup>, Mitsuyo Matsumoto<sup>6</sup>, Kazuhiko Igarashi<sup>6</sup>, John D. Phillips<sup>5</sup>, Barry H. Paw<sup>3,7</sup>, Jerry Kaplan<sup>1</sup>, Diane M. Ward<sup>1,8</sup>

<sup>1</sup>Department of Pathology, Division of Microbiology and Immunology, University of Utah School of Medicine, Salt Lake City, Utah 84132, <sup>3</sup>Department of Medicine, Division of Hematology, Brigham & Women's Hospital, Harvard Medical School, Boston, Massachusetts 02115, USA, <sup>4</sup>Department of Medicine, Division of Cardiovascular Medicine, Brigham & Women's Hospital, Harvard Medical School, Boston, Massachusetts 02115, USA, <sup>5</sup>Department of Medicine, Division of Hematology-Oncology University of Utah School of Medicine, Salt Lake City, Utah 84132, <sup>6</sup>Department of Biochemistry, Tohoku University Graduate School of Medicine, Sendai, Japan, <sup>7</sup>Department of Medicine, Division of Hematology-Oncology, Boston Children's Hospital, Harvard Medical School, and Department of Pediatric Oncology, Dana-Farber Cancer Institute, Harvard Medical School, Boston, Massachusetts 02115, USA

Materials included:

5 supplemental figures and figure legends.

Supplemental Figure 1 Abcb10 mutants are expressed and localize to mitochondria

MEL cells stably expressing control shRNA or Abcb10-specific shRNA were transfected with empty vector, wild type Abcb10-GFP or mutant Abcb10-GFP and stable cells lines selected by growth in 1 mg/ml G418. Expression of wild type or mutant Abcb10-GFP was assessed by Western blotting with tubulin as a load control (bottom panel) (A) and localization was determined by immunofluorescence using Mfrn1-FLAG as a mitochondrial marker (B). Cells were processed as described in Materials and Methods.

Supplemental Figure 2 Abcb10-shRNA MEL cells show decreased steady-state mRNA for heme related transcripts.

qRT-PCR for *Pgbd*, *Urod*, *Ppox*, *Tfr1*, *Bcl-xl*, *Fth*, *Ftl* and *Sod2* was performed using the primers listed in Table 2.

Supplemental Figure 3 Abcb10-shRNA MEL cells show reduced transduction efficiency.

qRT-PCR for human *Abcb10* and mouse  *$\beta$ -actin* was performed on control shRNA and Abcb10-specific shRNA MEL cells transduced with lentivirus based expression of human Abcb10 as in Figure 5C.

Supplemental Figure 4 Addition of SA did not alter *Alas2* or  *$\beta$ -Globin* mRNA levels in Abcb10-shRNA MEL cells.

qRT-PCR for *Mfrn1*, *Abcb10*,  *$\beta$ -Globin* and *Alas2* was performed using the primers listed in Table 2.

Supplemental Figure 5 Addition of hemin does not increase *Mfrn1*,  *$\beta$ -Globin*, *Alas2* or *Fech* transcripts but does increase *HO-1* transcripts in shRNA Abcb10 MEL cells.

qPCR for *Mfrn1*,  *$\beta$ -Globin*, *Alas2*, *Fech* and *Heme Oxygenase 1 (HO-1)* was performed on undifferentiated and differentiated control shRNA and Abcb10-specific shRNA MEL cells grown for three days with or without 75  $\mu$ M hemin.

# Supplemental Figure 1

**A**

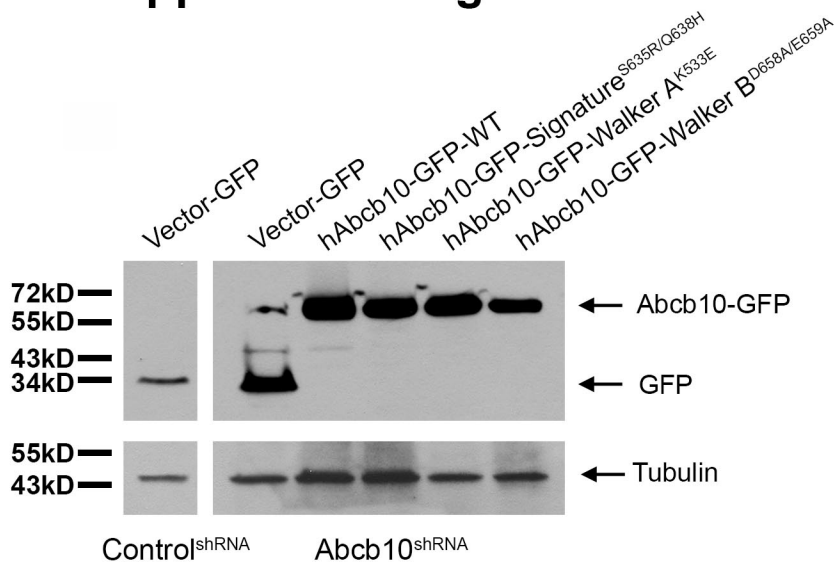

**B**

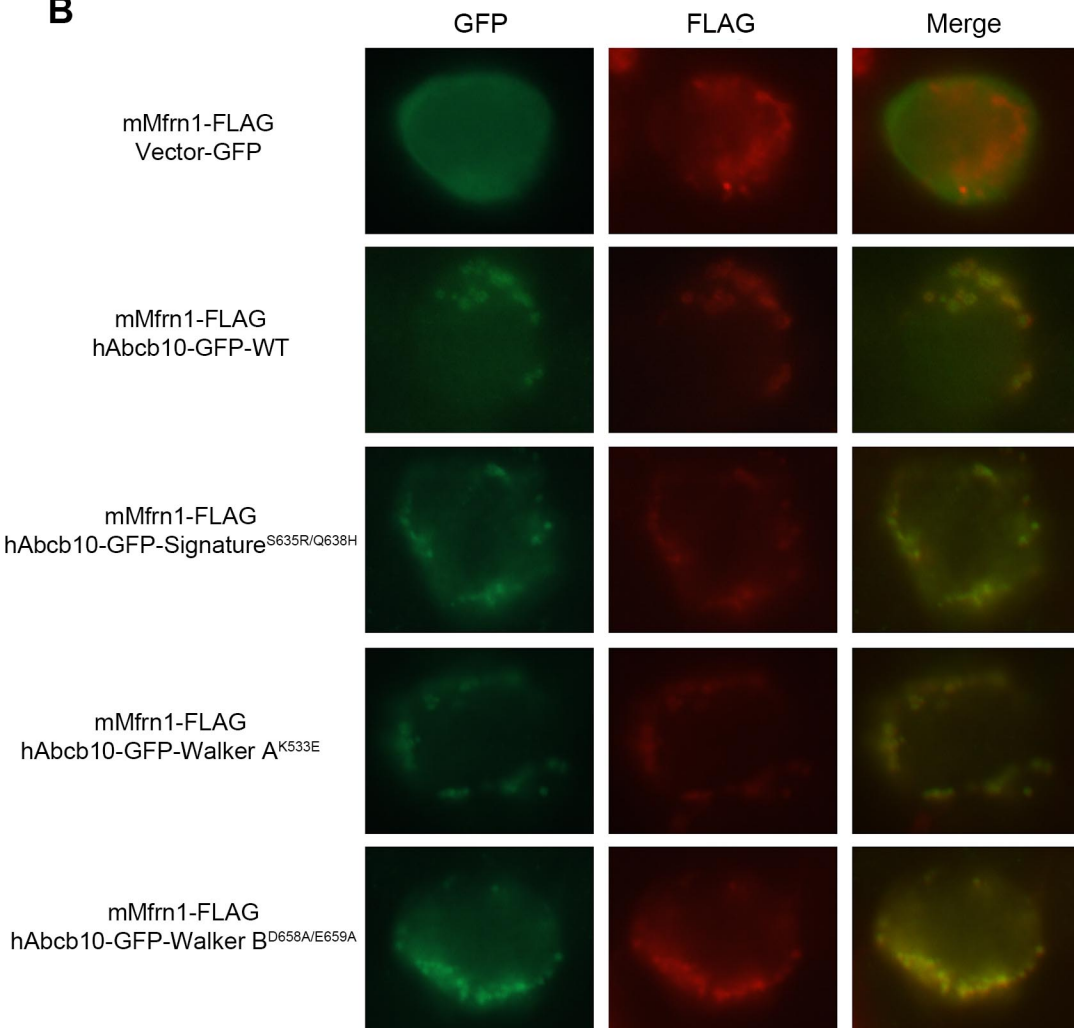

## Supplemental Figure 2

**A**

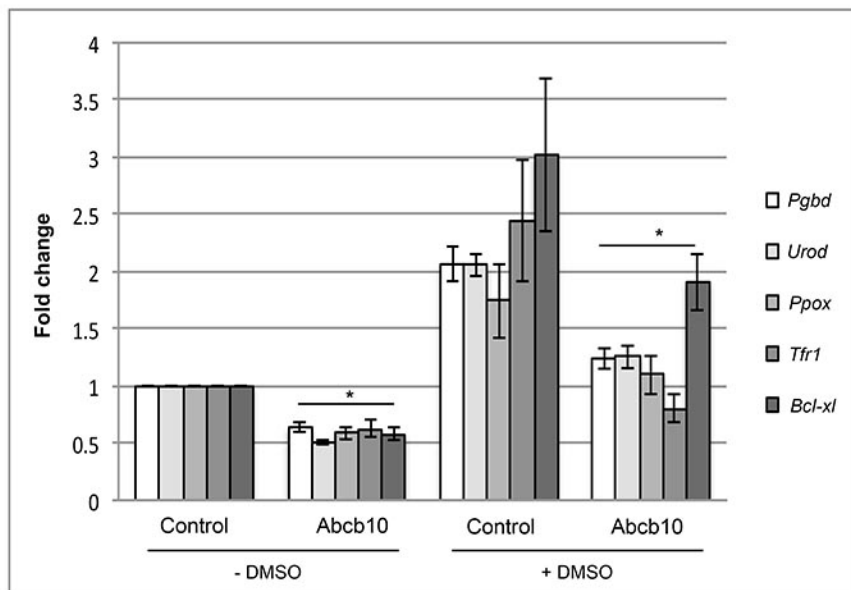

**B**

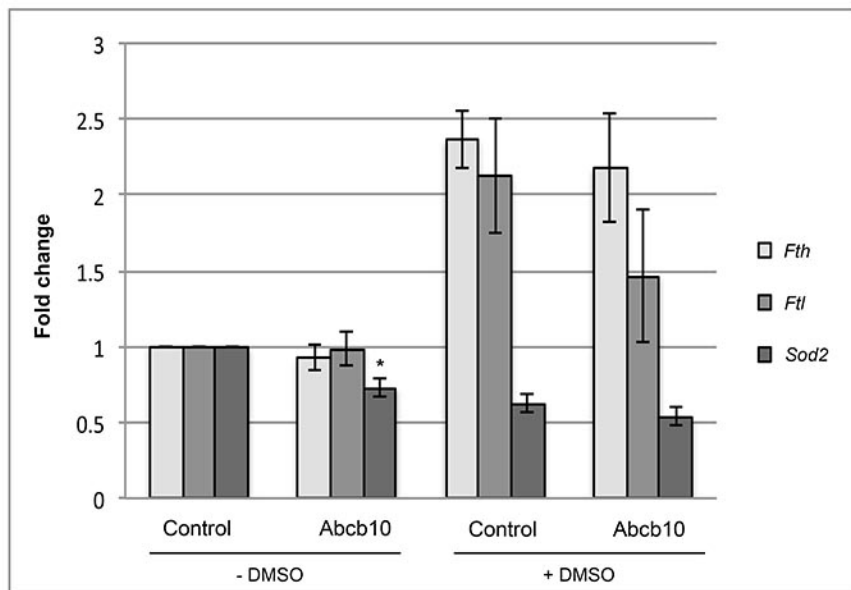

## Supplemental Figure 3

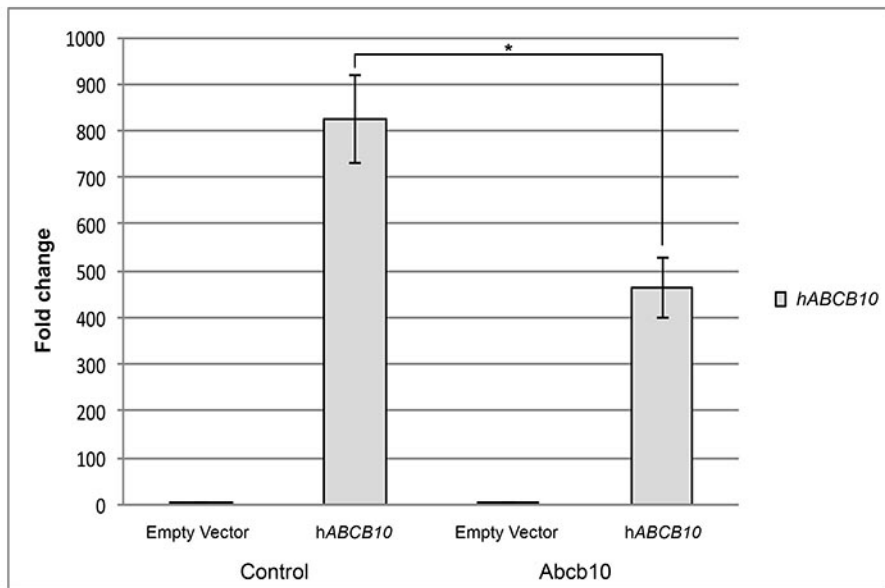

## Supplemental Figure 4

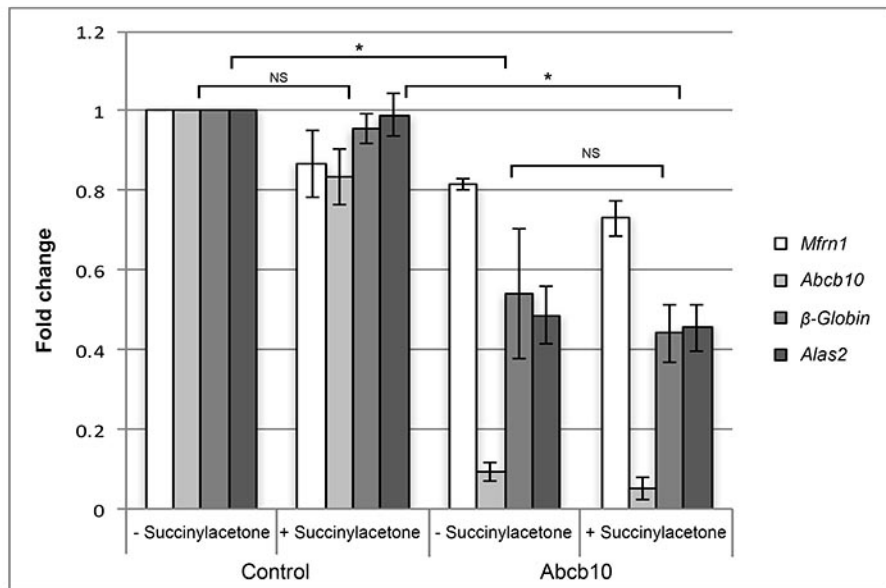

# Supplemental Figure 5

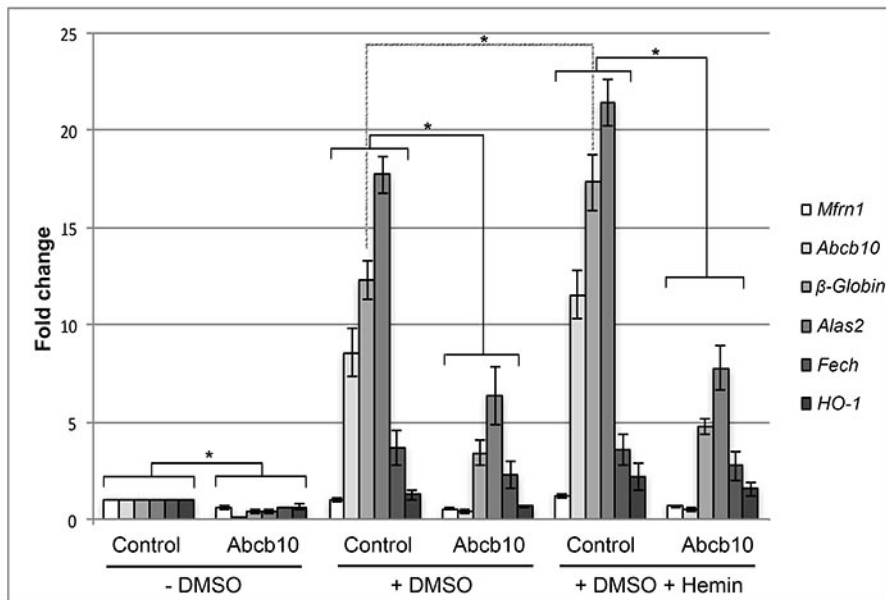

Supplement: 10.1074_M117.797415_jbc.M117.797415-1.pdf [file 10.1074_M117.797415_jbc.M117.797415-1.pdf]
